# Supplementary material
Source: publisher figshare collection journal article supplement (https://acs.figshare.com/ndownloader/files/4117510)
Supplement: Supplementary file 1 [file 4117510]

## Supporting Information

# **Enhanced Hole Injection in Phosphorescent Organic Light-Emitting Diodes by Thermally Evaporating a Thin Indium Trichloride Layer**

*Chun-Hong Gao, Shi-Duan Cai, Wei Gu, Dong-Ying Zhou, Zhao-Kui Wang<sup>\*</sup>, and Liang-Sheng Liao<sup>\*</sup>*

Jiangsu Key Laboratory for Carbon-Based Functional Materials & Devices, Institute of Functional Nano & Soft Materials (FUNSOM), Soochow University, Suzhou, Jiangsu 215123, China

E-mail: lsiao@suda.edu.cn; zkwang@suda.edu.cn

**Figure S1.** (a) The current density-voltage-luminance curves, (b) the current efficiency-current density curves, (c) the power efficiency-current density curves, and (d) the normalized EL spectra of Devices I, II, III, IV and V with the  $\text{InCl}_3$  layer thicknesses of 0, 0.5, 1, 1.5 and 2 nm, respectively. Device III with 1 nm  $\text{InCl}_3$  exhibits the best performance.

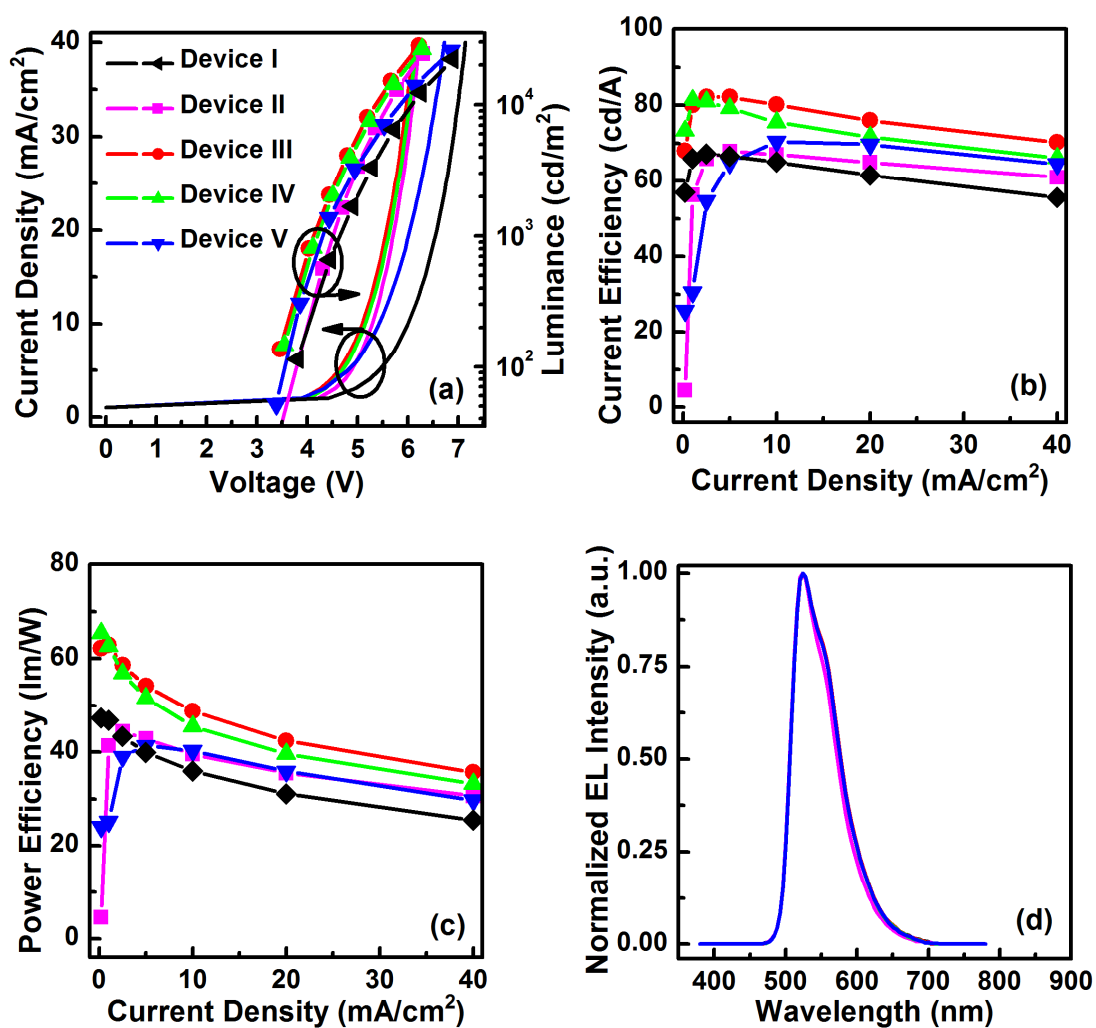

**Figure S2.** The log-log scale plot of current density-voltage curves of OLED Devices A, B and C. Device A: with 15 min UV-ozone treatment; Device B: with 15 min UV-ozone treatment and 1 nm thermally deposited  $\text{InCl}_3$ , and Device C with 1 nm  $\text{CF}_x$  deposited by plasma-assisted deposition of  $\text{CHF}_3$ .

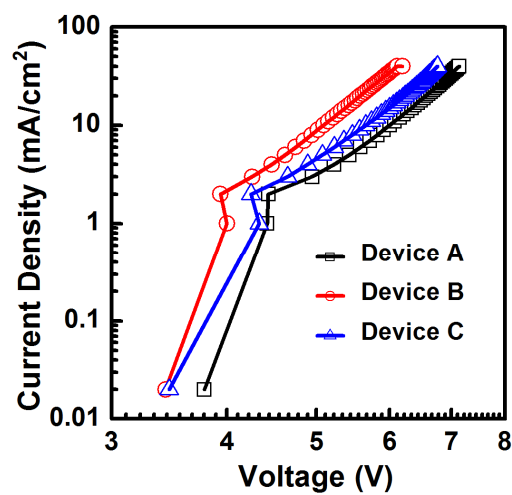

**Figure S3.** The SEM morphologies of (a) the ITO surface without  $\text{InCl}_3$  and (b) with 1 nm  $\text{InCl}_3$ . The morphology of ITO surface with 1 nm  $\text{InCl}_3$  is very different from that of the ITO without  $\text{InCl}_3$ .

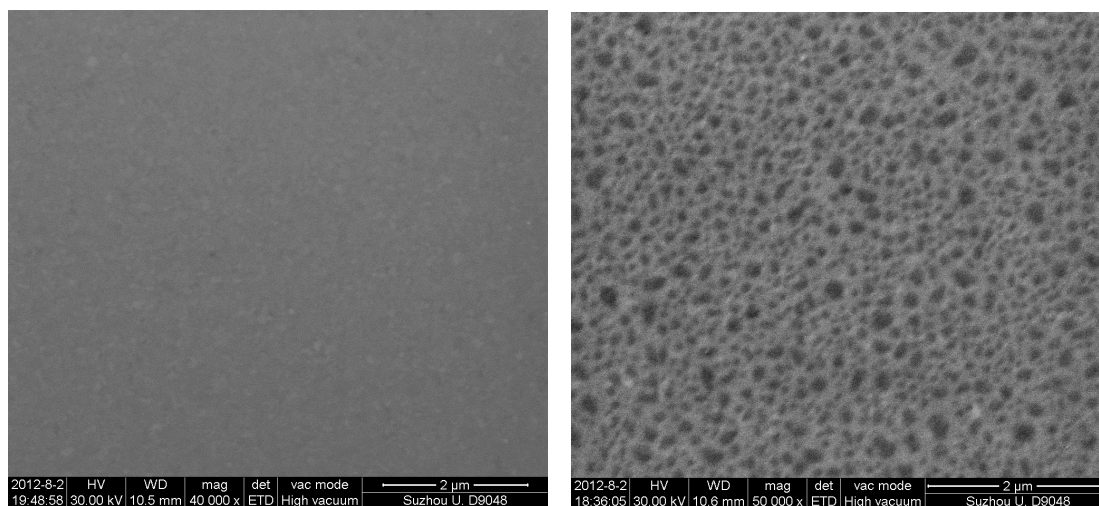

This information is available free of charge via the Internet at <http://pubs.acs.org/>.
